# Supplementary material
Source: PubMed Central journal article supplement (PMC7508575)

**Figure S1:** Correlation between observed clearance of ceftriaxone (CL) and different measures of renal function.

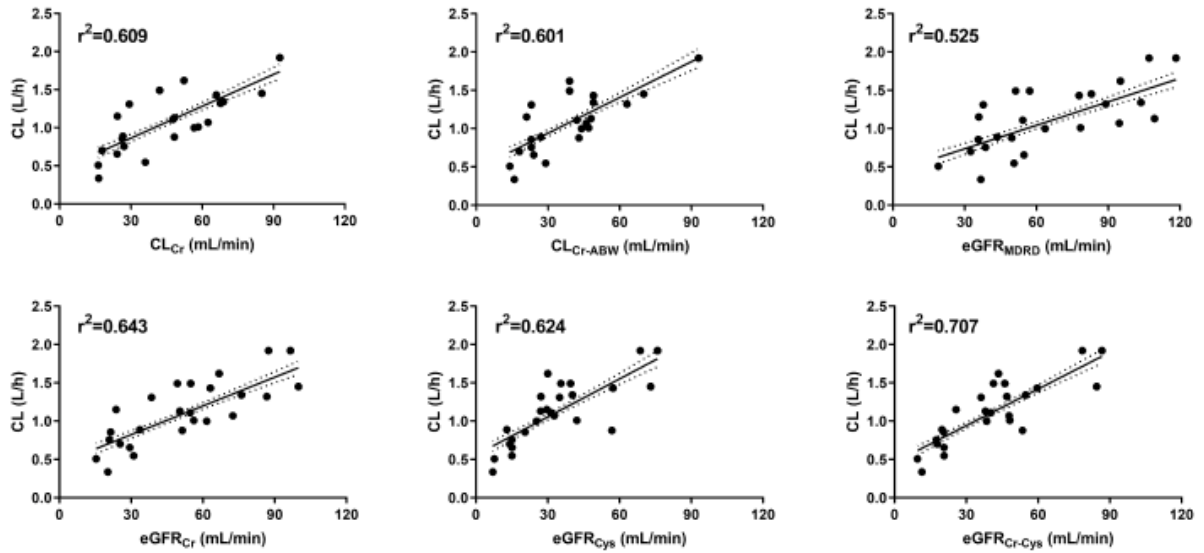

Supplement: AAC.00874-20-s0001.pdf [file AAC.00874-20-s0001.pdf]
